# Supplementary material for: The maternal-fetal transfer of passive immunity as a mechanism of transplacental nanoparticle drug delivery for prenatal therapies
Source: Royal Society of Chemistry journal article supplement (doi:10.1039/d2bm00293k), 2022-01-01
Supplement: d2bm00293k1.pdf [file d2bm00293k1.pdf]

Supplementary Data For:

**The maternal-fetal transfer of passive immunity as a mechanism of transplacental nanoparticle drug delivery for prenatal therapies**

Wai Hei Tse<sup>abc</sup>, Sean Higgins<sup>d</sup>, Daywin Patel<sup>abc</sup>, Malcolm Xing<sup>e</sup>, Adrian R. West<sup>bc</sup>, Hagar I. Labouta<sup>bf</sup>, and Richard Keijzer<sup>abc\*</sup>

<sup>a</sup>Departments of Surgery, Division of Pediatric Surgery and Pediatrics & Child Health, University of Manitoba, Manitoba, Canada.

<sup>b</sup>Children's Hospital Research Institute of Manitoba, Winnipeg, Manitoba, Canada.

<sup>c</sup>Department of Physiology & Pathophysiology, University of Manitoba, Manitoba, Canada

<sup>d</sup>Max Rady College of Medicine, University of Manitoba, Manitoba, Canada.

<sup>e</sup>Department of Mechanical Engineering, University of Manitoba, Manitoba, Canada.

<sup>f</sup>College of Pharmacy, University of Manitoba, Manitoba, Canada.

\*Corresponding author: Richard Keijzer

Email:richard.keijzer@umanitoba.ca

Table S1. Formulation of chitosan nanoparticles (CNPs)

| <b>Sample</b>       | <b>Chitosan<br/>Concentration</b> | <b>Chitosan<br/>volume (mL)</b> | <b>STPP<br/>Concentration</b> | <b>STPP volume<br/>(mL)</b> |
|---------------------|-----------------------------------|---------------------------------|-------------------------------|-----------------------------|
| CNP1<br>(Bare CNPs) | 3 mg/mL                           | 10                              | 5 mg/mL                       | 3                           |
| CNP2                | 2 mg/mL                           | 15                              | 3 mg/mL                       | 5                           |

Bare chitosan nanoparticles (bare CNPs) were synthesized by pouring 9 mL of a 5 mg/mL STPP solution into 30 mL of a 3 mg/mL chitosan solution. CNPs to be surface modified with IgG (CNP2) were synthesized by pouring 10 mL of a 3 mg/mL STPP solution into 30 mL of a 2 mg/mL chitosan solution. The as-synthesized NPs were centrifuged at 6500 rpm for 20 minutes and washed with deionized water thrice. CNPs were resuspended in deionized water via ultra-sonification on 30% power for 30 seconds.

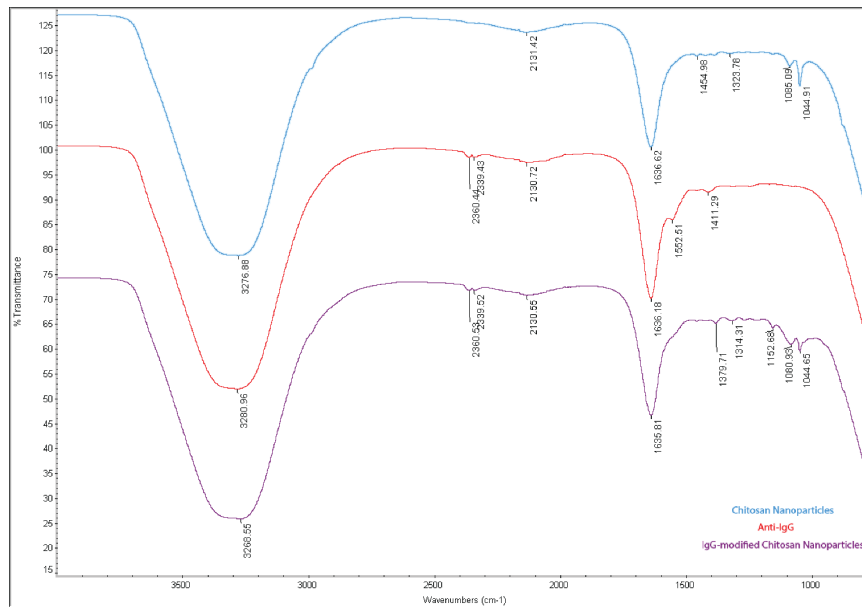

Figure S1. Bioconjugation of IgG to CNP2. Bioconjugation of IgG antibodies to CNP2 to form IgG-CNP was confirmed. FTIR spectrograph of IgG surface bioconjugation to CNP2. The combined spectra (purple) confirm the bioconjugation of unmodified CNP2 (blue) and IgG antibodies (red). Across all samples, a broad peak was detected around 3200  $\text{cm}^{-1}$  attributed to the stretching of hydroxyl (-OH), and amino (-NH, -NH<sub>2</sub>) groups. Stretching attributed to the interaction of water molecules with aromatic rings in the chitosan and amino acid structures was observed at 2130  $\text{cm}^{-1}$  and amino bending (-NH) was observed at 1636  $\text{cm}^{-1}$  across all samples. We observed stretching at 2340 and 2360  $\text{cm}^{-1}$  which is attributed to the carbonate groups (-COO-) and nitro compound stretching (-NO) at 1550  $\text{cm}^{-1}$  of peptide bonds in the anti-IgG. This also corresponds to the secondary structure of the IgG  $\alpha$ -helices and  $\beta$ -sheets. C-O stretches were observed between 1044 to 1323  $\text{cm}^{-1}$ . The 1550  $\text{cm}^{-1}$  peak observed in the FITR spectrum of the IgG-modified CNPs indicating conjugation of IgG to the CNPs.

Table S2. Physical properties of chitosan nanoparticle formulations

| Sample (n = 3)        | Size (nm)                     | Polydispersity Index                  | Zeta Potential (mV) |
|-----------------------|-------------------------------|---------------------------------------|---------------------|
| CNP1 (bare CNP)       | $375 \pm 17^{\delta}$         | $0.23 \pm 0.01^{\varepsilon}$         | $0.24 \pm 1.22$     |
| CNP2                  | $281 \pm 12^{\delta, \gamma}$ | $0.19 \pm 0.02^{\varepsilon, \gamma}$ | $0.02 \pm 0.72$     |
| CNP2-IgG<br>(IgG-CNP) | $414 \pm 27^{\gamma}$         | $0.30 \pm 0.02^{\varepsilon, \gamma}$ | $0.23 \pm 0.73$     |

A one-way ANOVA analysis with a Bonferroni's multiple comparison test was performed to compare effect of formulations on size, polydispersity index, and zeta potential. A significant difference in size was measured between CNP1 and CNP2 ( $p \leq 0.01$ ; 95% C.I. = [42.2, 146.8]) and CNP2 and CNP2-IgG ( $p \leq 0.001$ ; 95% C.I. = [-185.1, -80.47]). A significant difference in polydispersity index was measured between CNP1 and CNP2 ( $p \leq 0.05$ , 95% C.I. = [0.001503, 0.09650], CNP1 and CNP2-IgG ( $p \leq 0.05$ , 95% C.I. = [-0.1148, -0.01984]), and CNP2 and CNP2-IgG ( $p \leq 0.001$ , 95% C.I. = [-0.1638, -0.06884]). There was no significant difference in zeta potential ( $p = 0.9171$ ).

$\varepsilon$  represents  $p \leq 0.05$ ;  $\delta$  represents  $p \leq 0.01$ ;  $\gamma$  represents  $p \leq 0.001$ .

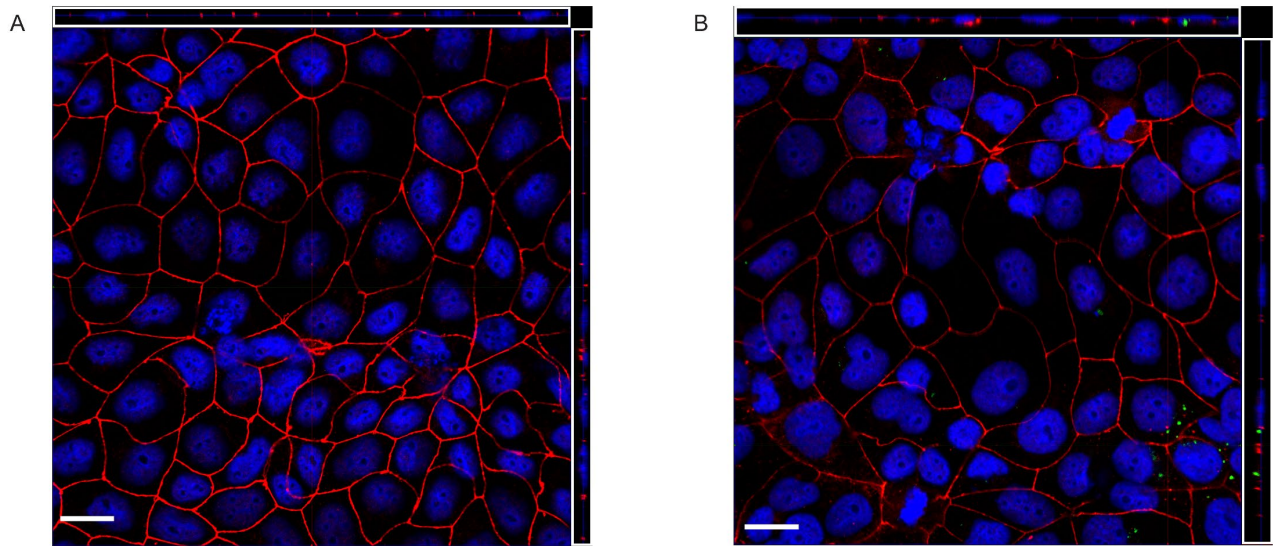

Figure S2. Orthographic projection of the established BeWo placental epithelial monolayer. Orthographic z-stack projections (white boxes) were obtained by laser scanning confocal microscopy. The establishment of zona occludens-1 (ZO-1, red) tight junction proteins was visualized by immunostaining. Nuclei were stained with DAPI (blue). Scale bar is 20  $\mu\text{m}$ . A) Projection of the BeWo placental epithelial cell monolayer. B) ZO-1 tight junctions remained intact 18 hours post-exposure to FITC-tagged IgG-CNPs (green). IgG-CNPs were detected within the cell body.
